# Supplementary material
Source: PubMed Central journal article supplement (PMC3830938)
Supplement: NIHMS498407-supplement-1_si_001.pdf [file NIHMS498407-supplement-1_si_001.pdf]

## Supporting Information

# **Molecular crowding enhanced ATPase activity of the RNA helicase eIF4A correlates with compaction of its quaternary structure and association with eIF4G**

Sabine R. Akabayov, Barak Akabayov, Charles C. Richardson, Gerhard Wagner\*

Department of Biological Chemistry and Molecular Pharmacology, Harvard Medical School, 240 Longwood Avenue, Boston, MA, 02115, USA

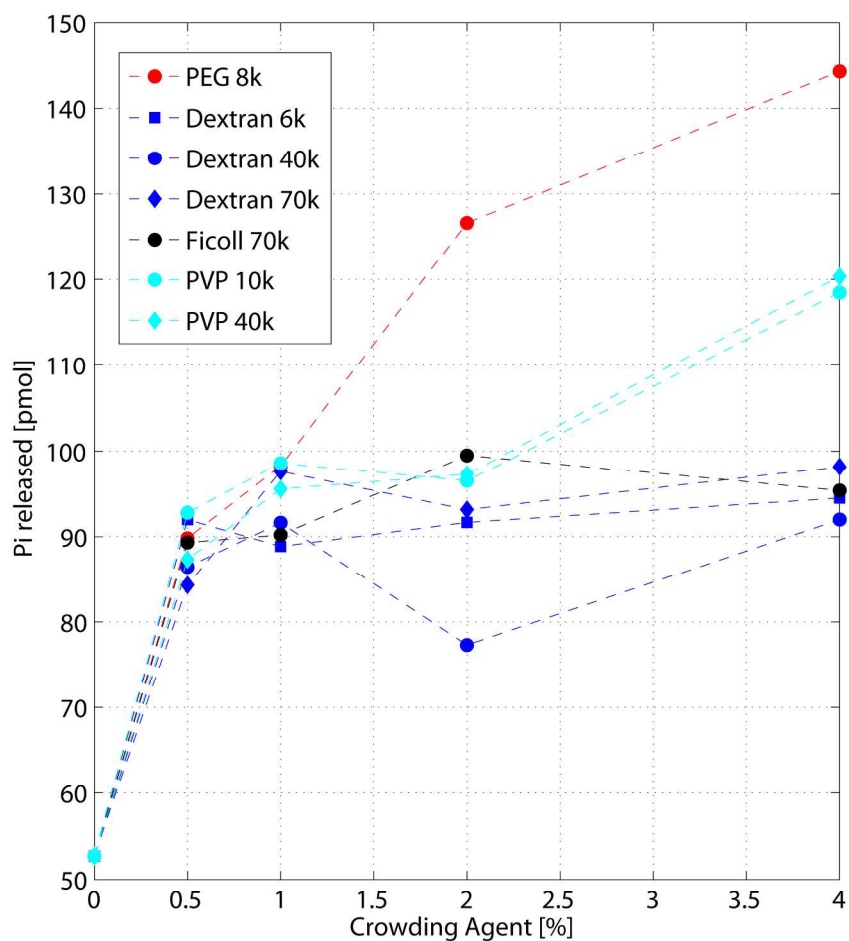

**Figure S1:** ATP hydrolysis activity of eIF4A using different types and sizes of crowding agents determined using a Norit assay. The reaction mixture (20  $\mu$ l) contained 10 mM Na-phosphate buffer (pH 7), 80 mM KCl, 3 mM MgCl<sub>2</sub>, 50 mM EDTA, 2 mM DTT, 50  $\mu$ M [ $\gamma$ -<sup>32</sup>P]-ATP (30 cpm/pmol), 3  $\mu$ M eIF4A and one of the crowding agents at concentrations ranging from 0 to 4%.

The standard assay for ATPase measures the formation of Norit-adsorbable nucleoside arising from the hydrolysis of [ $\gamma$ -<sup>32</sup>P]-ATP. Samples were incubated for 60 minutes at 37 °C. The reaction was stopped by the addition of 200  $\mu$ L of a solution consisting of 0.6 ml of 1 M HCl, 0.1 M Na<sub>4</sub>P<sub>2</sub>O<sub>7</sub>, 0.02 M KH<sub>2</sub>PO<sub>4</sub>, 0.2 ml of a Norit A suspension (20% packed volume), and 0.1 ml of bovine serum albumin (5 mg/ml). The solutions were mixed and allowed to sit for 5 min at 0 °C. After centrifugation, 4  $\mu$ L of the supernatant was spotted on a filter paper and the radioactivity was determined.

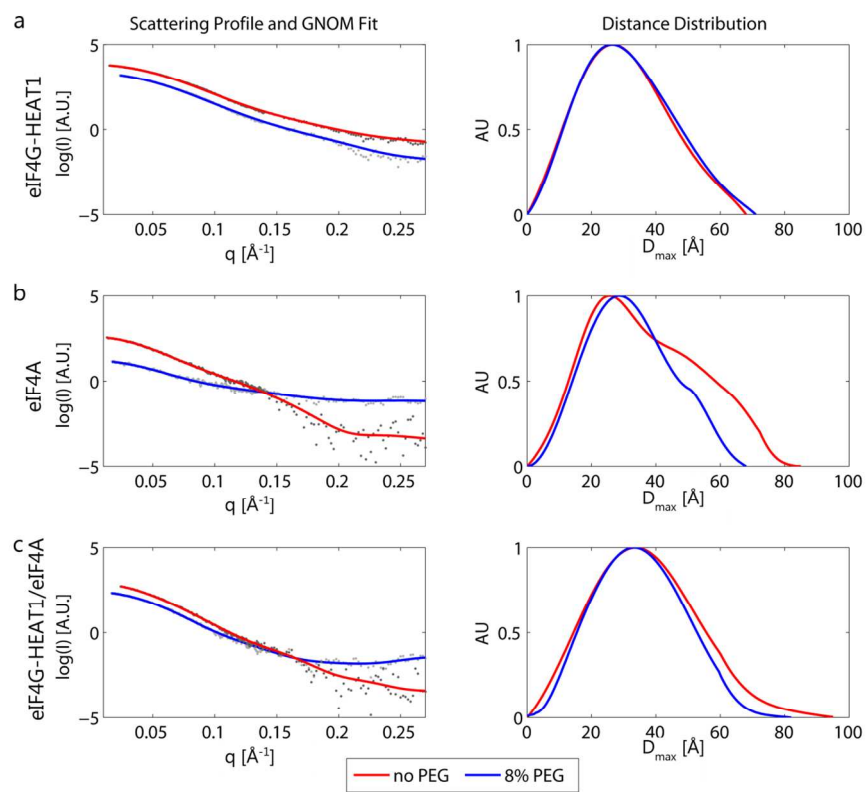

**Figure S2:** GNOM Fit and Distance Distribution Functions for eIF4G-HEAT 1 (a), eIF4A (b) and eIF4G-HEAT1/eIF4A (c).

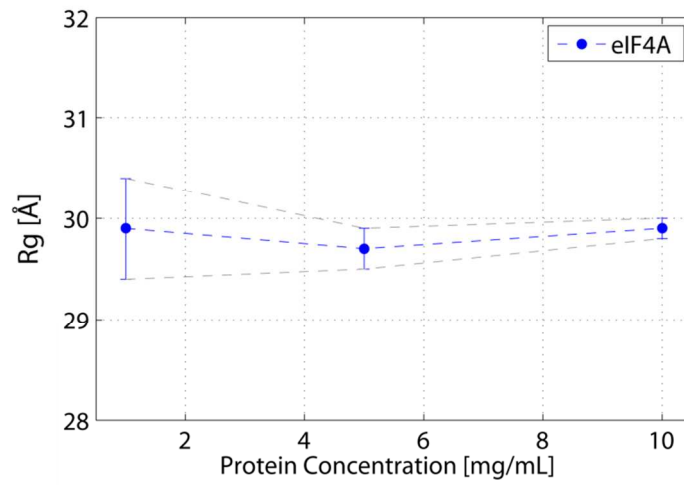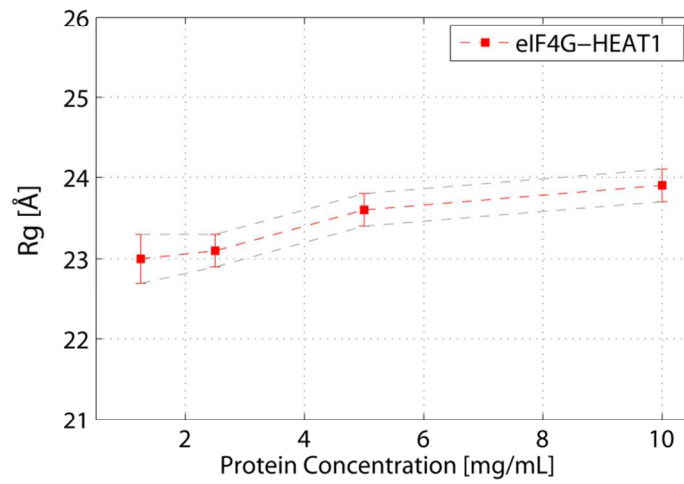

**Figure S3:** Concentration dependence of the radius of gyration for eIF4G-HEAT1 (red) and eIF4A (Blue). Rg values were determined from the Guinier plots of scattering profiles of samples with concentrations between 1 and 10 mg/mL.

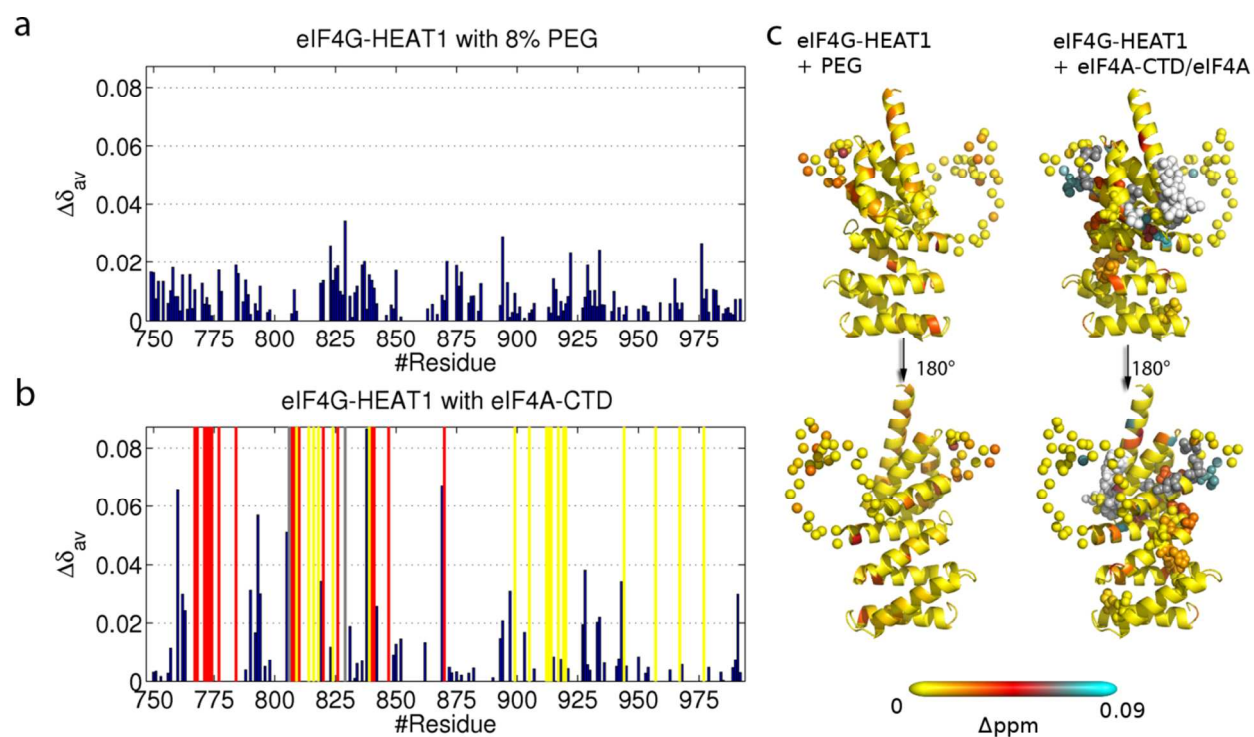

Figure S4: Chemical shift changes on eIF4G-HEAT1 upon addition of 8% PEG (a) and eIF4A-CTD (b). Chemical shift changes were calculated based on the formula  $\Delta\text{ppm} = \sqrt{(\Delta H)^2 + \left(\frac{\Delta N}{5}\right)^2}$  (equation S1). Red lines indicate residues that disappeared due to line broadening after addition of eIF4A-CTD. Yellow lines indicate residues that disappeared in addition after addition of full length eIF4A. Panel c shows the mapping of the chemical shift changes on the model of eIF4G-HEAT1. Residues that disappeared after addition of eIF4A-CTD or full length eIF4A are represented as spheres.

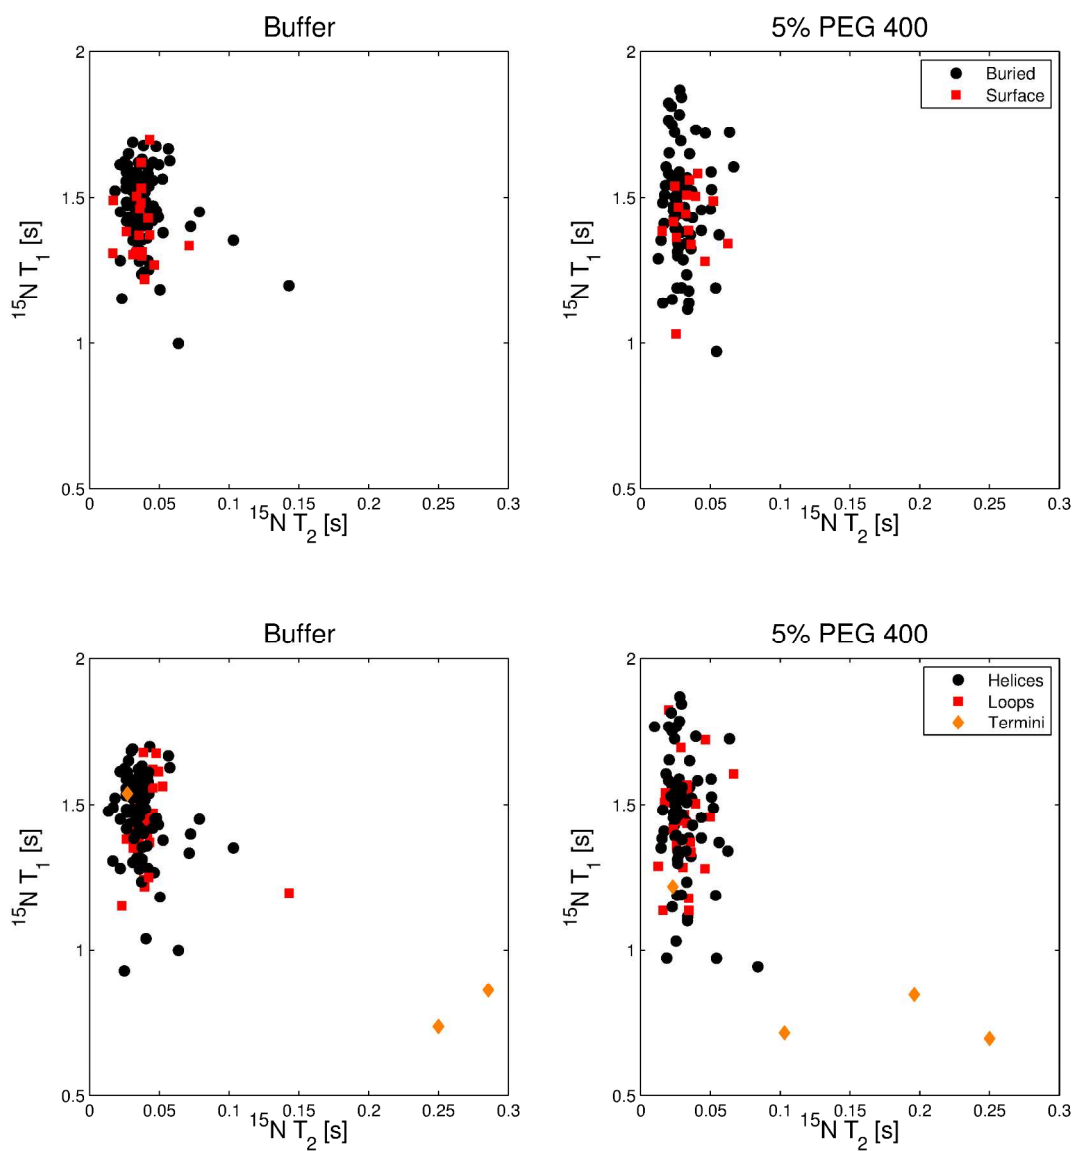

**Figure S5:**  $^{15}\text{N}-T_1/^{15}\text{N}-T_2$  plots for eIF4G-HEAT1 in buffer (left panels) and with addition of 5% PEG 400 (right panels). Color coding for the top row is according to surface accessibility (black: surface accessibility < 40%, red > 40%). Termini and the loop from 844-881 were not taken into account. Color coding in the bottom row was done according to secondary structure (black: helices, red: loops, orange: termini).
